# Supplementary material for: Transcription factor regulation and chromosome dynamics during pseudohyphal growth
Source: PubMed Central journal article supplement — Mol Biol Cell. 2014 Sep 1;25(17):2669–76. doi: 10.1091/mbc.E14-04-0871 (PMC4148256; doi:10.1091/mbc.e14-04-0871), 2014-09-01
Supplement: supp_E14-04-0871v1_CombinedSupMats.pdf [file supp_E14-04-0871v1_CombinedSupMats.pdf]

# Supplemental Materials

*Molecular Biology of the Cell*

Mayhew et al.

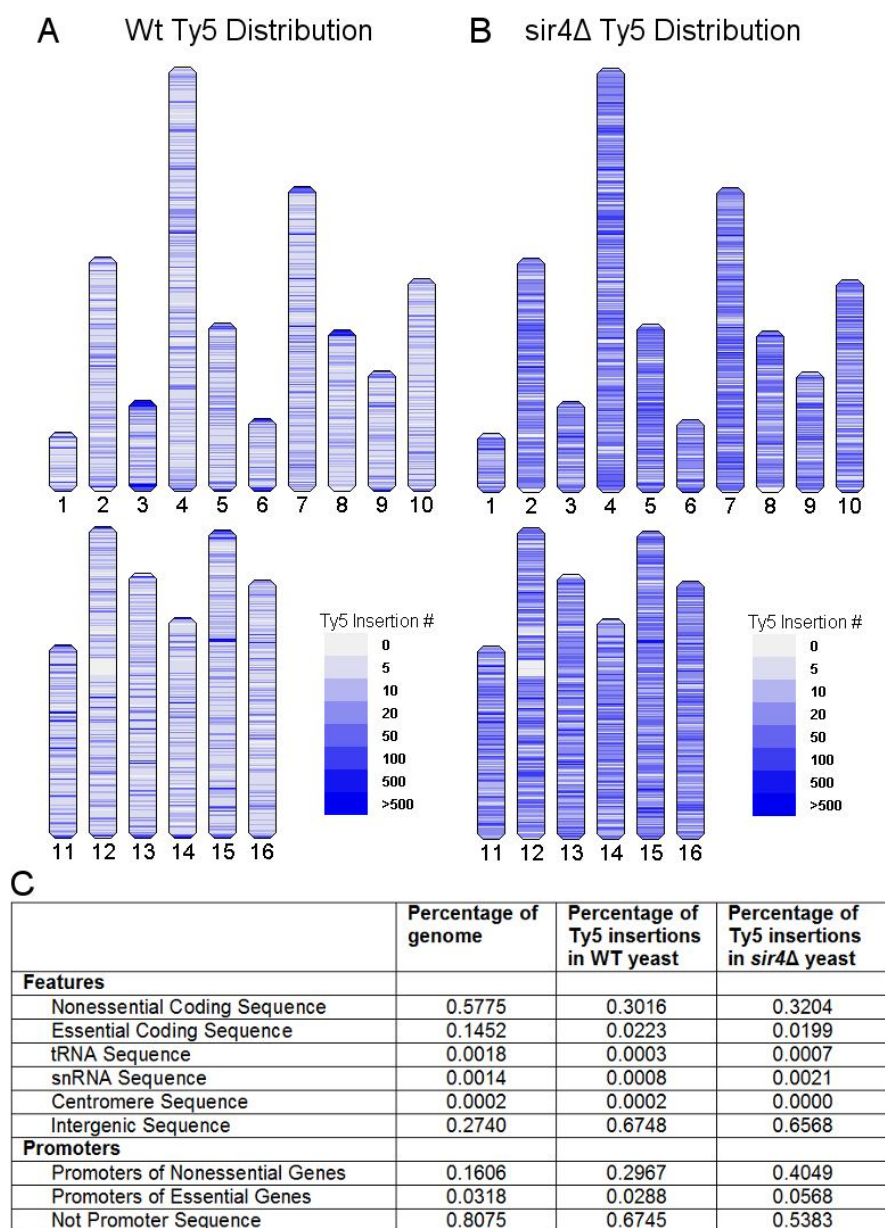

**Supplemental Figure 1.** Background distribution of Ty5 in the absence of TF-Sir4 expression. (A) In Wt cells the distribution of insertions is biased towards the telomeres and HML on chr III. (B) In *sir4Δ* mutant cells the distribution is more uniform across chromosomes. (C) Insertions into the coding sequence of essential genes are strongly selected against in both yeast strains; however, insertions into their promoters are not.

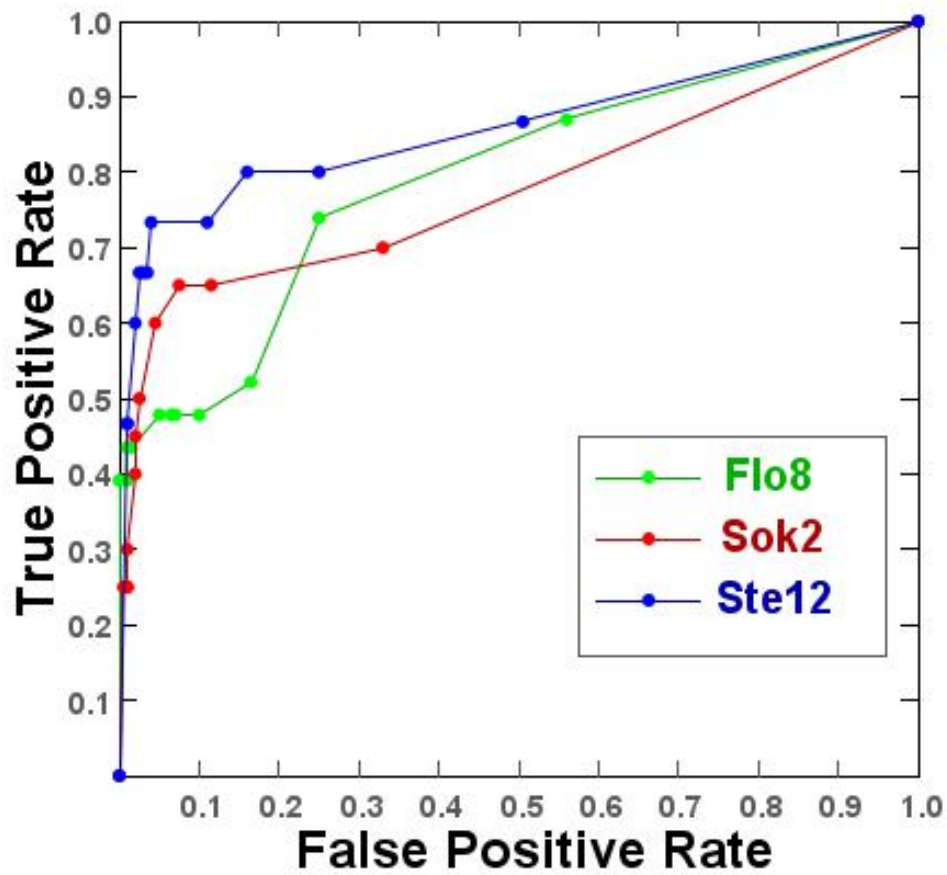

**Supplemental Figure 2.** Accuracy of 3 TFs from the Calling Card multiplex compared to those 3TFs tested in  $\Sigma$ 1278b background in diploid pseudohyphal growth conditions by ChIP-chip (Borneman et al. 2006) and a list of 250 negative targets generated from the same dataset. AUCs for Flo8, Sok2, and Ste12 were 0.79, 0.78, and 0.86 respectively.

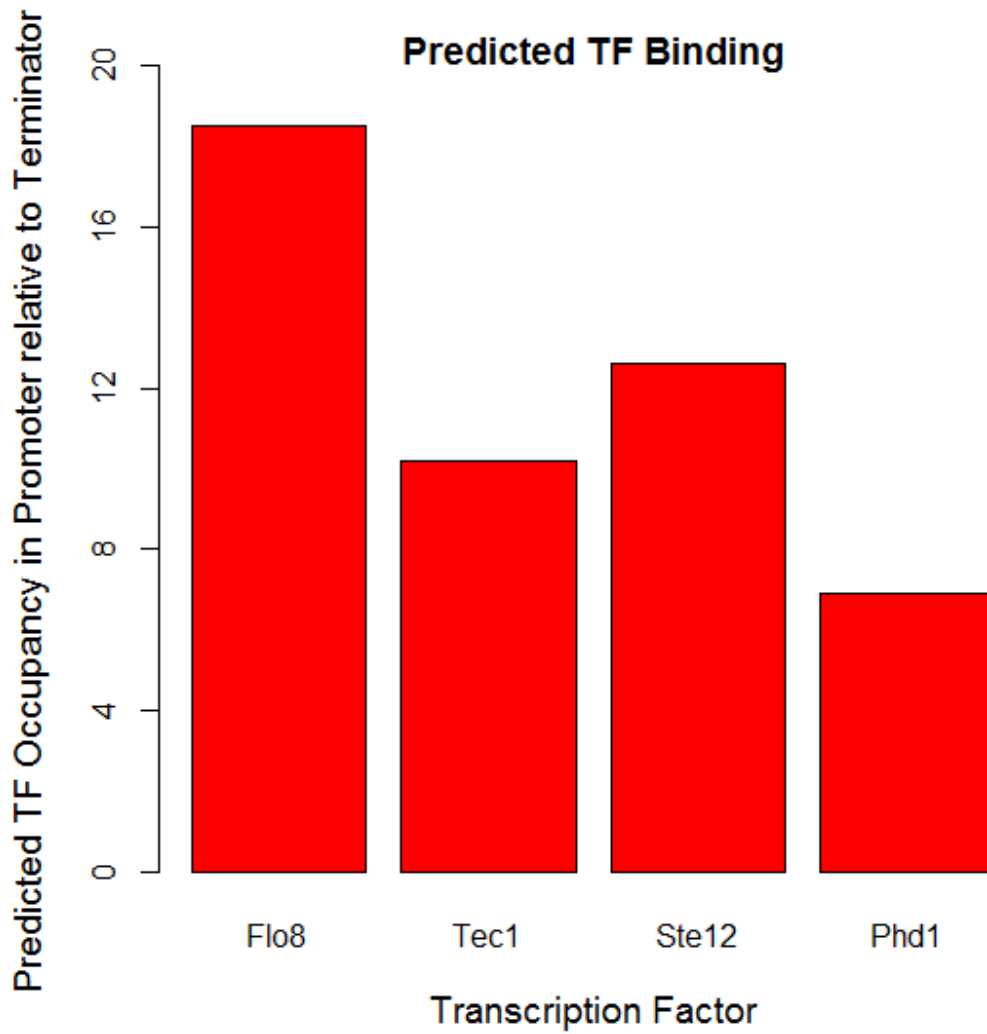

**Supplemental Figure 3.** TFs which serve as activators of *FLO11* expression are all more likely to be bound in the promoter of *FLO11* relative to its terminator given the DNA sequence and the known PWSM for each TF.

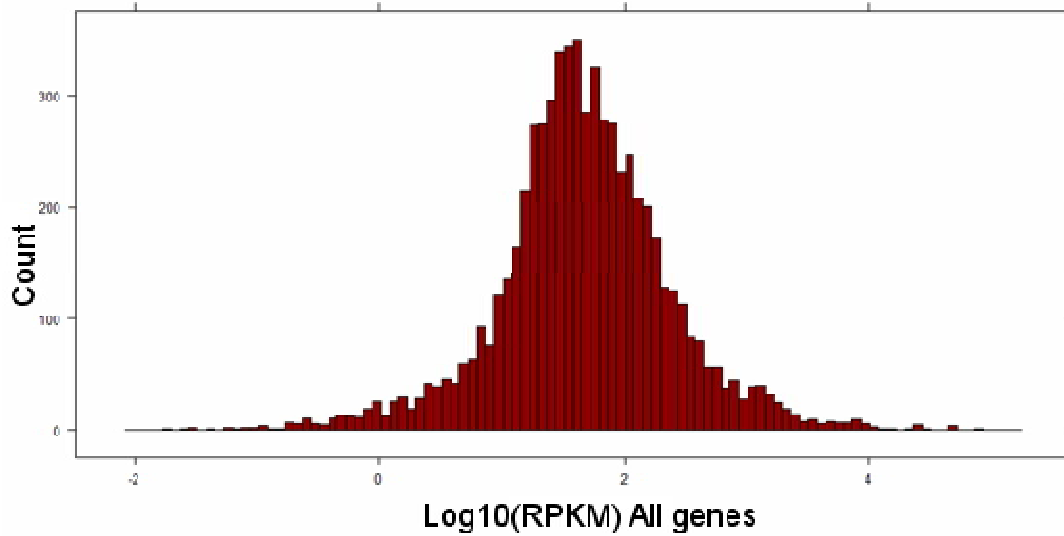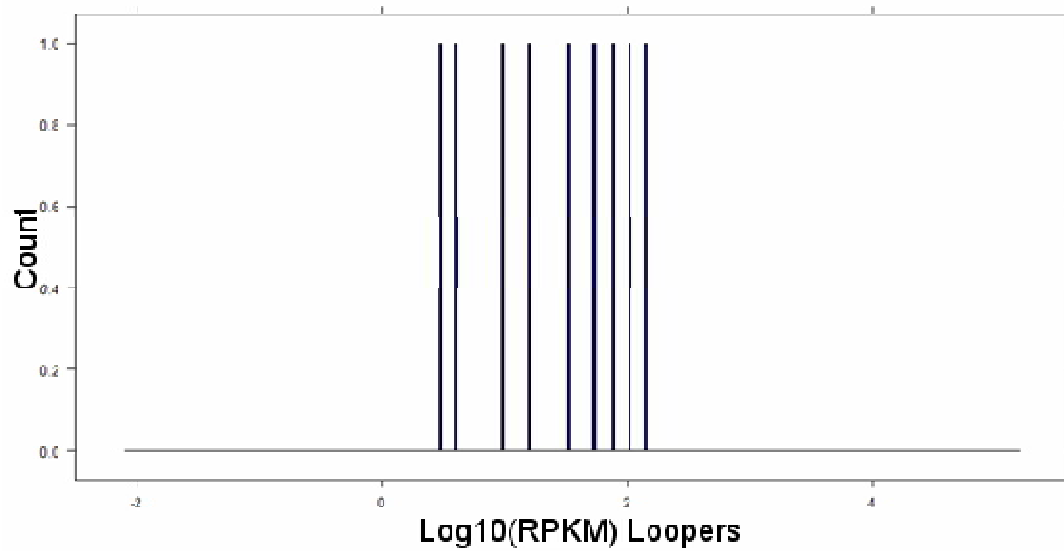

**Supplemental Figure 4.** Genes with looping events are not enriched for the most highly expressed genes. The expression of all 9 of the “looping” genes were at levels below the average of all genes.
